1        **Sero-prevalence of visceral leishmaniasis and its associated factors among**  
2        **asymptomatic pastoral community in Denan district, southeastern Ethiopia**

3        Ahmed Ismail<sup>1</sup>, Solomon Yared<sup>2</sup>, Sisay Dugassa<sup>3</sup>, Aduigna Abera<sup>4</sup>, Abebe Animut<sup>3</sup>, Berhanu  
4        Erko<sup>3</sup>, and Araya Gebresilassie<sup>5#</sup>

5  
6        <sup>1</sup>College of Veterinary Medicine, Jigjiga University, Jigjiga, Ethiopia

7        <sup>2</sup>Department of Biology, Jigjiga University, Jigjiga, Ethiopia

8        <sup>3</sup>Aklilu Lemma Institute of Pathobiology, Addis Ababa University, Addis Ababa, Ethiopia

9        <sup>4</sup> Malaria and Neglected Tropical Diseases Research Team, Ethiopian Public Health Institute,  
10       Addis Ababa, Ethiopia

11       <sup>5</sup>Department of Zoological Sciences, Addis Ababa University, Addis Ababa, Ethiopia

12       # Corresponding author

13       Email: [arayagh2006@yahoo.com](mailto:arayagh2006@yahoo.com) (AG)

14

15 **Abstract**

16 **Background:** In the Somali region of Ethiopia, visceral leishmaniasis (VL) is a public health  
17 concern. Yet, epidemiology and sand fly vectors of VL were not well studied in various areas  
18 of the regional state. Thus, the current study was conducted to determine the sero-  
19 prevalence, associated factors and distribution sand fly vectors of VL in Denan district,  
20 south-eastern Ethiopia.

21 **Methods:** A cross-sectional study was conducted among 187 households between May and  
22 September 2021 in six selected *Kebeles* of Denan district. In total, 187 blood samples were  
23 collected from individuals who visited Denan health center using a simple random sampling  
24 technique. Blood samples were subjected to Direct Agglutination Test for the detection of  
25 antibodies to VL. Pretested structured questionnaire was used to gather information on  
26 individual and household level risk factors and other characteristics of knowledge and  
27 attitude assessment. Sand flies were also collected from different sampling habitats using  
28 light and sticky traps.

29 **Results:** The overall sero-prevalence rate was 9.63% (18/187). Sero-prevalence was  
30 significantly associated with outdoor sleeping (OR=2.094), presence of damp floor  
31 (OR=9.732), and presence of cracked house walls (OR=6.283). Nearly half (53.48%) of the  
32 study participants had previously heard about VL. Communities were practicing different  
33 methods to prevent VL infection. In total, 823 sand fly specimens comprising 12 species in  
34 two genera (*Phlebotomus* and *Sergentomyia*) were trapped and identified. The most  
35 abundant species was *S Sergentomyia clydei* (50.18%), followed by *Phlebotomus orientalis*  
36 (11.42%).

37 **Conclusion:** The study demonstrated a relatively higher sero-positivity of VL in this new  
38 focus, and a remarkable gap in the knowledge, attitude and practices towards VL. *P.*  
39 *orientalis* was also detected, which could be a probable vector in this new focus. Thus,  
40 public education should be prioritized to improve the awareness of the community on VL  
41 and its public health impact. In addition, detailed epidemiological and entomological studies  
42 are recommended.

43 **Keywords:** Denan, sand fly, sero-prevalence, risk factor, visceral leishmaniasis

## 44 Introduction

45 Visceral leishmaniasis (VL), also known as Kala-azar, is a vector-borne parasitic disease  
46 caused by protozoan parasites of the *Leishmania donovani* complex and transmitted by  
47 blood-sucking sand flies. VL is endemic in 75 countries, and the estimated annual global  
48 incidence is 50,000–90,000 new cases [1]. About 90% of the global burden for VL is found in  
49 just 7 countries, 4 of which are in Eastern Africa (Sudan, South Sudan, Ethiopia and Kenya), 2  
50 in Southeast Asia (India, Bangladesh) and Brazil, which carries nearly all of cases in South  
51 America [2,3].

52  
53 Ethiopia has reported the third largest number of VL cases (1990), following South Sudan  
54 (2840) and Sudan (2813) of any country in sub-Saharan Africa region [4]. In Ethiopia, cases  
55 of VL have been reported from six regions (Tigray, Amhara, Oromia, Southern Nations and  
56 Nationalities People's Region, Somali and Afar) [5,6], with an annual burden estimated to be  
57 between 4, 500 and 7, 400 cases [7]. The incidence rate per 10,000 people in endemic areas  
58 is 6.28 [4]. This systemic disease is known to be endemic in Metema and Humera plains in  
59 northwest; in several localities of south western Ethiopia, i.e., the Omo plains, the Aba Roba  
60 focus in Segen valley, and Woito River valley adjacent to South Omo; in southern Ethiopia  
61 around Moyale area close to the borders with North Kenya; and in south eastern Ethiopia  
62 around Genale river basin in Oromia Regional State, Afder and Liban zones in Somali  
63 Regional State [6].

64  
65 In the Somali Regional State, VL outbreaks were first reported in 2001 from Afder, Liben,  
66 Denan and Hagele areas, bordering Kenya and Somalia [8]. Subsequently, VL cases have  
67 been reported sporadically from different areas of the regional state [9,10]. What is more,  
68 the national risk map survey indicated that a wide geographical areas stretching from south-  
69 eastern part of the Somali region to the Ethio-Somali-Kenyan boundaries as high-risk areas  
70 for VL [11]. Despite the public health significance and the recent occurrences of VL in  
71 different foci of the regional state, epidemiology and risk factors of VL were not adequately  
72 addressed.

73

74 Following continuous collections of sand flies to determine their fauna and epidemiological  
75 significance in the transmission of leishmaniases in different parts of the Ethiopia, so far  
76 65species belonging to the genus *Phlebotomus* and *Sergentomyia* have been identified [12].  
77 Of these, the incriminated vectors of VL, from which parasites have been detected and/or  
78 isolated and identified, include *P. martini*, *P. celiae*, and *P. orientalis* for *L. donovani* from the  
79 south, south-west and northern foci [13,14,15]. Study on sand fly vectors in VL endemic foci  
80 is very important to improve the understanding of the transmission dynamics and design  
81 vector control methods to reduce the burden of the disease. However, there are gaps in the  
82 knowledge of habitat preferences, behavior and distribution of sand flies in various VL foci  
83 of the Somali region.

84

85 Therefore, the investigation was designed to determine the sero-prevalence, knowledge,  
86 attitude and practices, and associated factors of VL, and abundance of sand fly species in  
87 Denan district, south-eastern Ethiopia.

88

## 89 **Materials and Methods**

### 90 **Study Area**

91 The study was carried out in Denan district of Shebelle zone in south-eastern Ethiopia (Fig  
92 1). Denan town, the administrative center of the district, is located 1,123 kilometres  
93 southeast of Addis Ababa. It is found at an elevation of about 490 meters above sea level,  
94 with a latitude and longitude of 6° 44' 59.99" N and 43° 19' 60.00" E, respectively. Denan  
95 has a subtropical desert climate with yearly temperature of 29.39°C. It typically receives  
96 about 19.24 millimeters of precipitation annually. The total population of Denan district is  
97 about 33,784 people according to the last Ethiopian national census of 2007 [16]. The  
98 district is composed of 12 administrative *kebeles* (the smallest administrative unit). Of  
99 which, six kebeles (Qora, Kore, Shinile, Birta-dheer, Awley, and Burqeyr) were selected for  
100 this study. Denan district has two health centres and nine health posts.

101

102 **Figure 1: Map of the study area in Shebelle zone of Somali Regional State, southeastern**  
103 **Ethiopia.**

104

## 105 **Study design and sample size determination**

106 A cross sectional study design was employed to determine the sero-prevalence of VL and  
107 identify the associated risk factors from April to August 2021. The sample size was  
108 estimated according to [17] by considering 15.8% previous prevalence of VL in a nearby  
109 district [10], 95% confidence interval (CI) ( $Z=1.96$ ) with 5% desired absolute precision (d),  
110 using the formula  $N=[(Z)^2 \times P (1-P)]/d^2$ . Consequently, a total of 204 human sera were  
111 required, however, 17 participants were excluded from the study as they refused to give  
112 blood sample.

## 113 **Sampling procedure**

114 Permanent residents and pastoral communities of the selected sites were enrolled in the  
115 study. Individuals who previously had VL were excluded. Single stage random sampling was  
116 applied for selecting the study participants for the field survey. Six *kebeles* including Qora,  
117 Kore, Shinile, Birta-dheer, Awley, and Burqeyr were selected. The sampling *kebeles* were  
118 selected based on the suspected cases of VL by reviewing case records of Denan health  
119 center, and transport accessibility. Households (187) were randomly selected from the six  
120 *kebeles*. One participant was then randomly selected from each household and contacted  
121 for informed consent/assent. The participants were requested to come in to Denan health  
122 center and in a nearby health posts for blood sample collection.

## 123 **Blood Sample Collection**

124 Five ml of venous blood was collected following standard operating procedures. Blood  
125 samples were obtained by skilled laboratory technician from the forearm veins of the study  
126 participants using sterile needle. The blood sample was dispensed into serum separator test  
127 tubes at Denan Health Centre lab and transported in a cool box to Addis Ababa. The serum  
128 was diagnosed by DAT at Ethiopian Public Health Institute.

129

## 130 **Direct Agglutination Test (DAT)**

131 In performing DAT, serum samples were serially diluted in physiological saline (0.9% NaCl)  
132 containing 0.8%  $\beta$ -mercaptoethanol. Two-fold serial dilutions of the sera were made,  
133 starting at a dilution of 1:100 and going up to a maximum serum dilution of 1:102,400.  
134 Freeze-dried DAT antigen produced by KIT Biomedical Research (DAT, Institute of Tropical  
135 Medicine—Antwerp (ITM), Belgium) was reconstituted with physiological saline. 50  $\mu$ L of

136 DAT antigen solution (concentration of  $5 \times 10^7$  parasites per ml) was added to each well  
137 containing 50  $\mu$ l of diluted serum. The results were read after 18 hours of incubation at  
138 ambient temperature. The cut-off value was established considering the titres obtained in  
139 samples from negative controls. Therefore, a sample was considered positive if it had a titre  
140 of 1:800 and above.

#### 141 **Assessment of KAP and associated factors**

142 A pre-tested structured questionnaire was designed to collect information regarding socio-  
143 demographics and associated factors such as house construction material and its condition,  
144 domestic animal ownership, sleeping habits, use of bed net and individual night and day  
145 activity. The questionnaire also comprised of questions relating to the respondents'  
146 knowledge, attitudes and common practices towards VL and sand flies. The questionnaire  
147 was first developed in English and translated into Af-Somali (the local language). Data were  
148 checked for completeness, and incomplete questionnaires were returned to data collectors  
149 for correction by revisiting the concerned households.

#### 150 **Sand fly collection and processing**

151 Entomological investigations were undertaken in four *kebeles* (Kore, Shinile, Birta-dheer,  
152 Awley) of Denan district during 4-12 April, 2021. The above four kebeles were selected as  
153 sampling sites based on suitability of habitats for species richness and abundance of sand  
154 flies and accessibility to transport. In the sampling villages, four representative trapping  
155 habitats such as indoor, peri-domestic, mixed forest and termite mounds were identified  
156 and used for the entire sand fly species collection. Sand flies were trapped for two  
157 consecutive nights at each sampling village, constituting a total of 12 collection nights. Sand  
158 flies were collected using CDC light traps and sticky traps.

159

160 **CDC light traps (CDC-LTs):** LTs were deployed at peri-domestic, mixed forest and termite  
161 mounds. Two LTs were set in representative sites of peri-domestic habitats. Another two LTs  
162 in each village were positioned to sample sand flies in mixed forest. Similarly, LTs were  
163 suspended in termite mounds. The traps were deployed 1 h before sunset and collected at  
164 dawn the next morning. Afterwards, the sand flies were sorted by sex and genus  
165 (*Phlebotomus* or *Sergentomyia* spp.), and preserved in 70% ethanol for later species  
166 identification.

167 **Sticky traps (ST):** A4-sized white sticky traps of polypropylene sheets coated with sesame oil  
168 were used for capturing sand flies from all sampling habitats. The ten STs were divided into  
169 2 sets each having five sheets tied together on nylon string about 50 cm apart and these  
170 were placed inside two different houses in each village to intercept and capture any  
171 endophilic sand flies. Similarly, two sets of sticky traps were also suspended randomly on  
172 cracked walls, stone piles, and animal enclosures in the peri-domestic environment. Another  
173 four sets of STs were also deployed in representative sites of mixed forest and termite  
174 mounds. Each morning, sand-flies from STs were removed using forceps and stored in 96%  
175 ethyl alcohol in labeled vials for identification.

#### 176 **Mounting and identification of sand flies**

177 Sand fly specimens were dissected and mounted on microscope slides in Hoyer's medium  
178 with their heads separate from thoraxes and abdomens. Slide-mounted flies were then  
179 identified to species level based on the external genitalia of males and the pharynx,  
180 antennal features and spermathecae of females, according to standard morphological keys  
181 [18].

#### 183 **Data analysis**

184 Statistical analyses were conducted using IBM SPSS statistics, version 20 for Windows (SPSS  
185 Inc., Chicago, IL, USA), and Microsoft® Office Excel 2007. Descriptive statistics was computed  
186 to determine frequency and percentage. The Chi square statistic was used to determine the  
187 associations between socio-demographic characteristics and VL positivity. Logistic  
188 regression was used to determine possible factors associated with VL. For all included  
189 studies, a P-value < 0.05 was regarded as statistically significant.

#### 190 **Ethical consideration**

191 This study was conducted after the protocol was reviewed and approved by the Institutional  
192 Review Board (IRB) of Aklilu Lemma Institute of Pathobiology, Addis Ababa University.  
193 Permission to conduct the study was also obtained from the Denan district health office  
194 after having thorough discussion on the procedures and purpose of the study. In addition,  
195 verbal informed consent was obtained from all selected individuals for the study after  
196 explaining the purpose of the study in the local language, Af-Somali.

197

198

## 199 **Results**

### 200 **Socio-demographic characteristics**

201 A total of 187 participants recruited from six *kebeles* of Denan district were included. Out of  
202 the total respondents, 119 (63.64%) and 68 (36.36%) were males and females, respectively.  
203 The minimum age of an individual included in the study was 18 years. The majority of  
204 respondents [110 (58.82%)] had no formal education. Most of the respondents [110 (54%)]  
205 had family size of 3. Majority of the participants were pastoralists (54.55%). Higher  
206 proportions of participants belonged to households living in Aqal, dome-shaped huts of  
207 traditional Somali house, (55.1%), with abundant termite mounds (48.1%) (Table 1).

208

209 **Table 1: Socio demographic characteristics of study participants of Denan district, Somali**  
210 **Region, south east Ethiopia, 2021.**

| Variable            | Categories          | Frequency | Percentage |
|---------------------|---------------------|-----------|------------|
| Age                 | >18                 | 44        | 23.53      |
|                     | 19-36               | 108       | 57.75      |
|                     | 37-54               | 27        | 14.44      |
|                     | ≥55                 | 8         | 4.28       |
| Sex                 | Male                | 119       | 63.64      |
|                     | Female              | 68        | 36.36      |
| Marital status      | Single              | 58        | 31.02      |
|                     | Married             | 127       | 67.91      |
|                     | Widowed             | 2         | 1.07       |
| Family size         | ≤ 3                 | 101       | 54         |
|                     | ≥ 4                 | 86        | 46         |
| Community lifestyle | Pastoralist         | 102       | 54.55      |
|                     | Agro-pastoralist    | 23        | 12.3       |
|                     | Urban               | 62        | 33.16      |
| Education           | Illiterate          | 60        | 32.09      |
|                     | Religious education | 50        | 26.74      |
|                     | Primary             | 37        | 19.79      |



|                           |                               |     |        |
|---------------------------|-------------------------------|-----|--------|
|                           | Secondary schooling and above | 40  | 21.39  |
| House type (wall)         | Woven mats (Aqal)             | 103 | 55.10% |
|                           | Mud and stick                 | 43  | 22.90% |
|                           | Concrete blocks               | 41  | 21.90% |
| Termite mounds near house | Yes                           | 90  | 48.10% |
|                           | No                            | 97  | 51.90% |
| Total                     |                               | 187 |        |

211

### 212 Sero-prevalence and associated factors of VL

213 The overall sero-prevalence rate of VL in the study area was 9.63% (18/187). Sero-  
 214 prevalence rates did not significantly vary between males (6.4%) and females (3.2%)  
 215 ( $P>0.05$ , Table 2). Individuals in the age groups 19-36 and 37-54 had highest DAT positivity  
 216 rates of 5.9% and 2.1%, respectively, while the lowest positivity rates were observed within  
 217 the age group of less than 55 (0.5%), followed by less than equal to 18 (1.1%) (Table 2). The  
 218 difference in DAT positivity by age group was statistically significant ( $P<0.05$ ).

219 Significant differences in the prevalence of VL were found among age groups, housing type  
 220 (walls), floor condition, outdoor sleeping, and sleeping near animal shelter ( $P<0.05$ ).  
 221 However, variables such as sex, family size, marital status, wood burning, sleeping near  
 222 specific vegetation, and house spray with insecticide were found to be statistically non-  
 223 significant ( $P>0.05$ ) (Table 2).

224 **Table 2: Factors associated with transmission of visceral leishmaniasis in univariate**  
 225 **analysis in Denan district, Somali Region, southeast Ethiopia, 2021.**

| Variables | Categories | Total | DAT<br>positive #<br>(%) | Odds<br>Ratio<br>(OR) | 95% CI |       | P-<br>value |
|-----------|------------|-------|--------------------------|-----------------------|--------|-------|-------------|
|           |            |       |                          |                       | Lower  | Upper |             |
| Gender    | Male       | 119   | 12 (6.4%)                | 0.019                 | 0.082  | 0.095 | 0.498       |
|           | Female     | 68    | 6 (3.2 %)                |                       |        |       |             |
| Age       | <18        | 45    | 2 (1.1%)                 | 4.389                 | 0.004  | 0.146 | 0.038       |
|           | 19-36      | 110   | 11 (5.9%)                |                       |        |       |             |

|                                            |                     |     |           |       |       |        |       |
|--------------------------------------------|---------------------|-----|-----------|-------|-------|--------|-------|
|                                            | 37-54               | 24  | 4 (2.1%)  |       |       |        |       |
|                                            | <55                 | 8   | 1 (0.5%)  |       |       |        |       |
|                                            | Single              | 58  | 7 (3.7%)  |       |       |        |       |
| Marital status                             | Married             | 127 | 11 (5.9%) | 3.148 | 0.189 | 0.314  | 0.251 |
|                                            | Divorced            | 2   | 0         |       |       |        |       |
| Family size                                | ≤3                  | 101 | 10 (5.3%) | 0.091 | 0.071 | 0.098  | 0.754 |
|                                            | ≥4                  | 86  | 8 (4.3%)  |       |       |        |       |
| House type<br>(wall)                       | Woven<br>mats(Aqal) | 103 | 13 (7.0%) |       |       |        |       |
|                                            | Mud and<br>stick    | 43  | 5 (2.6%)  | 0.424 | 0.185 | 0.974  | 0.043 |
| Wall<br>characteristics                    | Concrete<br>blocks  | 41  | 0         |       |       |        |       |
|                                            | Cracked             | 121 | 14 (7.5%) | 6.283 | 1.041 | 44.403 | 0.045 |
| Floor condition                            | Not cracked         | 66  | 4 (2.1%)  |       |       |        |       |
|                                            | Damp                | 54  | 1 (1.8%)  | 7.767 | 1.007 | 59.902 | 0.049 |
| Sleeping outside                           | Dry                 | 133 | 17 (7.8%) |       |       |        |       |
|                                            | Yes                 | 141 | 16 (8.6%) | 11.64 | 1.439 | 94.101 | 0.021 |
| Sleeping outside<br>near animal<br>shelter | No                  | 46  | 2 (1.1%)  |       |       |        |       |
|                                            | Yes                 | 102 | 14 (7.5)  | 0.31  | 0.098 | 0.982  | 0.046 |
| Sleeping near<br>vegetation                | No                  | 85  | 4 (2.1%)  |       |       |        |       |
|                                            | Yes                 | 30  | 2 (1.1)   | 0.71  | 0.07  | 0.174  | 0.4   |
| Wood burning                               | No                  | 157 | 16 (8.5)  |       |       |        |       |
|                                            | Yes                 | 47  | 4 (2.1%)  | 3.316 | 0.629 | 5.709  | 0.185 |
| House sprayed<br>with insecticides         | No                  | 140 | 14 (7.5%) |       |       |        |       |
|                                            | Yes                 | 61  | 5 (2.6%)  | 2.686 | 0.038 | 0.145  | 0.249 |
|                                            | No                  | 125 | 13 (7.0%) |       |       |        |       |

226

227 Table 3 shows risk factors associated with VL in multivariable logistic regression models.

228 Being in the age group of 19-36 increases the odds of getting VL infection (P=0.034).

229 Similarly, individuals with the habit of sleeping outdoors near animal shelter likely to be at  
230 risk of acquiring VL infection than those sleeping indoor. Participants who owned houses  
231 with damp floor were found to have high DAT positivity compared to those who had their  
232 house with dry floor (Table 3).

233

234 **Table 3: Factors associated with transmission of VL in multivariate analysis in Denan**  
235 **district, Somali Region, southeast Ethiopia, 2021**

| Variables                               | Categories | Total | DAT<br>positive #<br>(%) | Odds<br>Ratio<br>(OR) | 95% CI |        | P-<br>value |
|-----------------------------------------|------------|-------|--------------------------|-----------------------|--------|--------|-------------|
|                                         |            |       |                          |                       | Lower  | Upper  |             |
| Age                                     | >18        | 45    | 2 (1.1%)                 | 0.441                 | 0.207  | 0.94   | 0.034       |
|                                         | 19-36      | 110   | 11 (5.9%)                |                       |        |        |             |
|                                         | 37-54      | 24    | 4 (2.1%)                 |                       |        |        |             |
|                                         | ≤55 (ref)  | 8     | 1 (0.5%)                 |                       |        |        |             |
| Floor condition                         | Dry (ref)  | 54    | 1 (1.8%)                 | 0.09                  | 0.012  | 0.705  | 0.022       |
|                                         | Damp       | 133   | 17 (7.8%)                |                       |        |        |             |
| Outdoor sleeping                        | Yes        | 141   | 16 (8.6%)                | 4.35                  | 2.052  | 9.224  | 0.001       |
|                                         | No (ref)   | 46    | 2 (1.1%)                 |                       |        |        |             |
| Sleeping outdoor<br>near animal shelter | Yes        | 102   | 14 (7.5)                 | 2.521                 | 0.534  | 11.908 | 0.031       |
|                                         | No (ref)   | 85    | 4 (2.1%)                 |                       |        |        |             |

236

### 237 Knowledge of VL and sand fly vectors

238 Among the total participants, 100 (53.48%) had heard about the disease, and 42%  
239 responded that sand fly bite is responsible for VL transmission (Table 4). The most common  
240 sources of VL related information were health personnel (48%), followed by friends and  
241 neighbors (39%), mass media (radio and television) (5%), and school (8%). Most of the  
242 respondents (89%) knew at least one clinical sign and symptom of VL, and 41% of them  
243 indicated that abdominal swelling is the key symptom of VL. A substantial number of  
244 respondents (78%) mentioned the disease as treatable. Around 87.5% of respondents  
245 replied that they were aware of sand fly breeding grounds, and 21% indicated that they  
246 have multiple breeding habitats.

247 **Table 4: Knowledge on VL among study participants Denan district, Somali Region,**  
 248 **southeast Ethiopia, 2021**

| Variables                           | Categories               | Frequency | Percentage (%) |
|-------------------------------------|--------------------------|-----------|----------------|
| Heard about VL (n = 187)            | Yes                      | 100       | 53.48          |
|                                     | No                       | 87        | 46.52          |
| Source of VL information (n=100)    | Health personnel         | 48        | 48             |
|                                     | Friends and neighbors    | 39        | 39             |
|                                     | Media (Radio and TV)     | 5         | 5              |
|                                     | School                   | 8         | 8              |
| Mode of transmission (n=100)        | Contact with sick people | 18        | 18             |
|                                     | Sandfly bite             | 42        | 42             |
|                                     | Spoiled food             | 3         | 3              |
|                                     | Mosquito bite            | 23        | 23             |
|                                     | Don't know               | 14        | 14             |
| VL signs and symptoms               | Fever                    | 7         | 7              |
|                                     | Headache and fatigue     | 3         | 3              |
|                                     | Abdominal swelling       | 41        | 41             |
|                                     | Multiple answers         | 38        | 38             |
|                                     | Don't know               | 11        | 11             |
| Treatability of VL (n=100)          | Yes                      | 78        | 78             |
|                                     | No                       | 7         | 7              |
|                                     | Don't know               | 15        | 15             |
| Identify the sand fly (n=187)       | Yes                      | 96        | 51.33          |
|                                     | No                       | 91        | 48.7           |
| Sand flies found around your houses | Yes                      | 76        | 79.17          |
|                                     | No                       | 20        | 20.83          |
| Sand fly breeding sites             | Cracks of houses         | 20        | 20.8           |
|                                     | Termite mounds           | 14        | 14.6           |
|                                     | Near animal shelter      | 12        | 12.5           |
|                                     | Crevices of tree         | 17        | 17.7           |
|                                     | Multiple domestic areas  | 21        | 21.9           |
|                                     | Don't know               | 12        | 12.5           |

249  
 250 **Attitude and practices of the participants on VL and sand flies vector**

251 Table 5 shows attitudes and practices of the participants about visceral leishmaniasis. Below  
 252 50% of the respondents stated that VL is an important public health problem in the area,  
 253 while 52% considered the opposite. Majority (68%) of the respondents preferred public  
 254 health care services as their first priority for VL treatment. Regarding the fatality, 44% of the

255 respondents claimed that VL is fatal at all. Only 36% of the respondents believed that VL is  
 256 preventable (Table 5).

257 In this study, participants were practicing different methods to prevent VL: 42% of the  
 258 respondents used a bed net, 32% used insecticide spraying, 14% practiced smoking plant  
 259 parts, and 8% cleaned their environments (Table 5).

260 **Table 5: Attitude and practice of the participants on VL and sand flies vectors (n= 100)**

| Variables                          | Categories                 | Frequency | Percent (%) |
|------------------------------------|----------------------------|-----------|-------------|
| <b>Attitudes</b>                   |                            |           |             |
| Severity of VL                     | Very serious               | 3         | 3           |
|                                    | Serious                    | 45        | 45          |
|                                    | Ordinary                   | 52        | 52          |
| VL important public health problem | Yes                        | 48        | 48          |
|                                    | No                         | 52        | 52          |
| Preventability of VL               | Yes                        | 36        | 36          |
|                                    | No                         | 59        | 59          |
|                                    | I don't know               | 5         | 5           |
| VL will be fatal if left untreated | Yes                        | 44        | 44          |
|                                    | No                         | 56        | 56          |
| <b>Practices</b>                   |                            |           |             |
| Drug preference for VL treatment   | Specific medicine          | 44        | 44          |
|                                    | Indigenous medicine        | 12        | 12          |
|                                    | Both specific & indigenous | 36        | 36          |
|                                    | Don't know                 | 8         | 8           |
| Seek treatment from                | Health center              | 68        | 68          |
|                                    | Traditional medicine       | 20        | 20          |
|                                    | Self-medication            | 12        | 12          |
| Prevention measures of VL          | Bed net                    | 42        | 42          |
|                                    | Insecticide spraying       | 32        | 32          |
|                                    | Smoking tree branches      | 14        | 14          |
|                                    | Clean environment          | 8         | 8           |
|                                    | Don't know                 | 4         | 4           |

261

262 **Species composition of trapped sand fly**

263 A total of 823 sand flies were collected and identified. The sand fly fauna included both the  
 264 genus *Phlebotomus* and *Sergentomyia* (Table 6). Twelve species were morphologically

265 identified to the species level, and these sand fly species were *P. orientalis*, *P. alexandri*, *P.*  
266 *papatasi*, *P. rodhaini*, *P. saevus*, *S. clydie*, *S. bedfordi* group, *S. schwetzi*, *S. africana*, *S.*  
267 *antennata*, *S. squamipluris*, and *S. heisch* (Table 6). In total, 355 (43.13%), 284 (34.51%), 174  
268 (21%), and 10 (1.22%) sand fly specimens captured using LTs and STs deployed in termite  
269 mounds, forest, peri-domestic, and indoor habitats, respectively (Table 6).

270 **Table 6: Species of sand flies collected from different sampling sites of Denan district,**  
271 **Somali Region, southeast Ethiopia, 2021**

| Species                | Number of sand fly specimens in different sampling habitats |            |          |          |            |            |                |            |            |
|------------------------|-------------------------------------------------------------|------------|----------|----------|------------|------------|----------------|------------|------------|
|                        | Peri-domestic                                               |            | Indoor   |          | Forest     |            | Termite mounds |            | Total      |
|                        | Male                                                        | Female     | Male     | Female   | Male       | Female     | Male           | Female     |            |
| <i>Phlebotomus</i>     |                                                             |            |          |          |            |            |                |            |            |
| <i>orientalis</i>      | 5                                                           | 5          | 0        | 0        | 13         | 18         | 29             | 24         | 94         |
| <i>P. alexandri</i>    | 2                                                           | 6          | 1        | 1        | 19         | 21         | 6              | 9          | 65         |
| <i>P. papatasi</i>     | 9                                                           | 19         | 0        | 1        | 4          | 3          | 3              | 7          | 46         |
| <i>P. rodhaini</i>     | 0                                                           | 1          | 0        | 0        | 4          | 0          | 0              | 0          | 5          |
| <i>P. saevus</i>       | 0                                                           | 1          | 0        | 0        | 0          | 0          | 2              | 1          | 4          |
| <i>Sergentomyia</i>    |                                                             |            |          |          |            |            |                |            |            |
| <i>clydie</i>          | 41                                                          | 40         | 6        | 0        | 72         | 59         | 111            | 84         | 413        |
| <i>S. bedfordi</i>     |                                                             |            |          |          |            |            |                |            |            |
| group                  | 1                                                           | 13         | 0        | 0        | 19         | 26         | 11             | 20         | 90         |
| <i>S. schwetzi</i>     | 1                                                           | 3          | 0        | 1        | 2          | 3          | 18             | 16         | 44         |
| <i>S. africana</i>     | 0                                                           | 14         | 0        | 0        | 3          | 13         | 4              | 6          | 40         |
| <i>S. antennata</i>    | 2                                                           | 2          | 0        | 0        | 2          | 3          | 3              | 0          | 12         |
| <i>S. squamipluris</i> | 5                                                           | 4          | 0        | 0        | 0          | 0          | 0              | 0          | 9          |
| <i>S. heischi</i>      | 0                                                           | 0          | 0        | 0        | 0          | 0          | 1              | 0          | 1          |
| <b>Total</b>           | <b>66</b>                                                   | <b>108</b> | <b>7</b> | <b>3</b> | <b>138</b> | <b>146</b> | <b>188</b>     | <b>167</b> | <b>823</b> |

272

273

274

275 **Relative abundance and sex ratio of sand fly species**

276 Of the 214 *Phlebotomus* specimens, *P. orientalis* constituted 43.9% of sand flies captured,  
 277 followed by *P. alexandri* (30.37%), *P. papatasi* (21.49%), *P. rodhaini* (2.33%), and *P. saevus*  
 278 (1.86%). Among *Sergentomyia* spp., *S. clydei* was the most predominant species, accounting  
 279 for 67.81% and 50.18% of *Sergentomyia* species and the entire sand fly collection,  
 280 respectively. Abundance of other *Sergentomyia* species in descending order were *S.*  
 281 *bedfordi* group (14.78%), *S. schwetzi* (7.22%), *S. africana* (6.57%), *S. antennata* (1.97%), *S.*  
 282 *squamipluris* (1.48%), and *S. heischi* (0.16%) (Table 7).

283 Overall male/female ratio for different species of sand flies was 0.94 (Table 7), with 51.5%  
 284 females and 48.5% males. In light traps, the sex ratio was 0.7, while on the sticky traps it  
 285 was slightly in favor of males with 1.36:1.

286 Table 6: Relative abundance and sex ratio of sand fly species from Denan district, Somali  
 287 Region, southeast Ethiopia

288

| Species                  | Type of collections methods |            |            |              |            | Sex ratio   | Total      | Relative frequency (%) |
|--------------------------|-----------------------------|------------|------------|--------------|------------|-------------|------------|------------------------|
|                          | Light traps                 |            | Sex ratio  | Sticky traps |            |             |            |                        |
|                          | M                           | F          |            | M            | F          |             |            |                        |
| <i>P. orientalis</i>     | 25                          | 28         | 0.89       | 22           | 19         | 1.16        | 94         | 11.42                  |
| <i>P. alexandri</i>      | 17                          | 25         | 0.68       | 11           | 12         | 0.92        | 65         | 7.89                   |
| <i>P. papatasi</i>       | 11                          | 24         | 0.46       | 5            | 6          | 0.83        | 46         | 5.59                   |
| <i>P. rodhaini</i>       | 1                           | 1          | 1          | 3            | 0          | NA          | 6          | 0.61                   |
| <i>P. saevus</i>         | 1                           | 2          | 0.5        | 1            | 0          | NA          | 4.5        | 0.47                   |
| <i>S. clydie</i>         | 102                         | 113        | 0.90       | 128          | 70         | 1.83        | 413        | 50.18                  |
| <i>S. bedfordi group</i> | 14                          | 36         | 0.39       | 17           | 23         | 0.74        | 90         | 10.94                  |
| <i>S. schwetzi</i>       | 5                           | 4          | 1.25       | 16           | 19         | 0.84        | 45         | 5.35                   |
| <i>S. africana</i>       | 4                           | 28         | 0.14       | 3            | 5          | 0.6         | 40         | 4.865                  |
| <i>S. antennata</i>      | 4                           | 5          | 0.8        | 3            | 0          | NA          | 12         | 1.46                   |
| <i>S. squamipluris</i>   | 5                           | 4          | 1.25       | 0            | 0          | NA          | 10         | 1.096                  |
| <i>S. heischi</i>        | 0                           | 0          | 0          | 1            | 0          | NA          | 1          | 0.126                  |
| <b>Total</b>             | <b>189</b>                  | <b>270</b> | <b>0.7</b> | <b>210</b>   | <b>154</b> | <b>1.36</b> | <b>823</b> |                        |

289

## 290 Discussion

291 Wide areas in the Somali region have been predicted to have a high VL risk based on the  
292 environmental factor-based geographical information and statistics risk mapping [11].  
293 Nevertheless, data on the epidemiology of VL in various endemic areas of the region barely  
294 exist. In this regard, a study was carried out to determine the sero-prevalence, associated  
295 factors and sand fly vectors of VL in Denana district, south-eastern Ethiopia. In this study,  
296 the overall sero-prevalence of *L. donovani* among asymptomatic individuals was 9.63% by  
297 DAT. The DAT positivity rate of 9.63% in this survey was lower than previous rate of 12.5%  
298 among migrant laborers in Kafta-Humera lowlands [19], and higher than that from Raya  
299 Azebo, northeastern Ethiopia [20], and from different areas of Benishangul-Gumuz region,  
300 western Ethiopia [21], who reported 0.8% and 5.9%, respectively. In addition, the current  
301 sero-prevalence rate was higher than previous report of 3.0% using ELISA test from  
302 neighboring districts of Gode and Adadle, southeastern Ethiopia [10]. Possible reasons for  
303 such variation could be related to difference in agro-ecological settings, possible  
304 predisposing risk factors, serological diagnostic techniques, and intervention strategies.

305 Understanding factors that determine VL exposure in endemic foci provide a vital  
306 foundation of knowledge for designing and developing effective control methods. The  
307 findings of this study showed that adults in the age group 19-36 had elevated VL risk. In  
308 contrast to this finding, earlier studies in Ethiopia [10,22,23], and elsewhere [24,25,26] have  
309 shown a higher risk of VL in individuals under 15 years compared to adults. The contributing  
310 factors for such higher burden of disease among adults might be related to activities like  
311 migratory and outdoor lifestyles, involving cattle herding or sleeping outside, that imply an  
312 increased potential exposure to the sand fly vector, and that are culturally specific to male  
313 adolescents and male adults. The differences in design may also account for this difference,  
314 as the cited studies were carried out in a population with a different age distribution with  
315 more than 50% of the sample being below 15 years.

316 The results also showed that there is a strong association between VL and poor housing  
317 condition such as damp floor. Floor dampness was identified as a major independent risk  
318 factor in India and Nepal [27,28], apparently showing that houses with damp floors could  
319 provide the adequate needs for the sand fly vector survival. Outdoor sleeping was identified



320 as a risk factor for VL in our study area, which is also consistent with other reports  
321 [10,23,29,30]. However, owning large family size was not found to be associated with  
322 increased VL risk in our study area, which is in disagreement with earlier reports that large  
323 family size was associated with a higher risk of VL [31,32].

324

325 The current study also assessed participants' knowledge, attitude, and practices about VL  
326 infection. A little more than half of the respondents (53.48%) had heard about VL. Our  
327 finding is lower than the 85% and above found in earlier reports in Ethiopia [33]. Only 42%  
328 of study participants knew that sand fly is the cause of VL transmission. This value is higher  
329 than the findings of reports on VL from Bihar in India (32.1%) [34], and northwest Ethiopia  
330 (30%) [32]. However, this result is lower than the 68.1% found in a study in northwest  
331 Ethiopia [33]. Moreover, most of the respondents (89%) knew at least one clinical sign and  
332 symptom of VL. This figure is in agreement with a report from Welkait district, northwest  
333 Ethiopia, where 88% of the respondents were aware of at least one clinical sign [35].  
334 Nevertheless, our value exceeds the findings of a report on VL in northwest Ethiopia (62%)  
335 [33]. Such variability of knowledge among the various studies could be associated with the  
336 difference in the setting of the study and public awareness activities conducted, and the fact  
337 that VL and its related information is not well established in the area.

338 Most of the respondents (59%) believed that VL is not preventable, while only 36% of the  
339 study participants said that the disease could be prevented. Our result is in contrast with  
340 Alemu et al. [33] and Berhe et al. [35], who reported that 81.2% and 90.5% of respondents  
341 believe VL is treatable. In addition, only 44% of the study participants knew that if the  
342 disease is left untreated the outcome will be death, which is by far lower than that of a  
343 study reported from northwest Ethiopia [33], where 96.7% of participants perceive that VL  
344 is fatal. In our study area people have poor perceptions towards VL preventability and its  
345 fatality, suggesting more has to be done to increase the awareness of the community.

346 In this study, it was evidenced that on top of bed net, other preventive and control activities  
347 were practiced by the study participants to protect themselves from any biting flies  
348 including sand flies. Forty two percent of the respondents use bed nets, 32% insecticide  
349 spraying, 14% smoking tree branches, and 8% clean their environments against for the  
350 control of VL transmission by sandfly bites. This percentage is higher than that of a study

351 carried out in the Indian state of Bihar [34]; where 21.4% of the respondents used bed nets  
352 for the control of sand fly bites. Nevertheless, it is lower than a report from northwest  
353 Ethiopia, where around 70% of the respondents used a bed net for the prevention of VL  
354 [32]. Awareness creation and sensitization activities performed in relation to malaria  
355 control, the availability of anti-mosquito repellants in most drug shops and culture of the  
356 community to use plant parts for different smoking activities may have contributed to  
357 better practices towards the control and prevention of VL in our study area.

358 In general, this study indicated that the overall unfavorable knowledge and attitude about  
359 the disease was alarming in a sense far from satisfactory. In addition to that, specific  
360 habitats of sandfly resting and breeding areas were seen in all the study kebeles. On top of  
361 that, residents in the study area practiced outdoor sleeping activities owing a very high risk  
362 for being a blood meal source for exophilic vectors species in these ecological settings.

363 Along the sero-prevalence and KAP studies, an entomological investigation was carried out  
364 to determine the sand fly vectors of VL. Among the 65 sand fly species known in Ethiopia, 12  
365 (18.5%) species of sand flies were identified in this study. The sand fly species composition  
366 recorded in the this study is concurrent with previous reports in other parts of Ethiopia  
367 [10,36-38]. Five species of *Phlebotomus* were identified during this study, where *P. orientalis*  
368 was the dominant species, constituting 11.42% of total sand fly captures. *P. orientalis* is the  
369 vector of VL caused by *Leishmania donovani* in Sudan, South Sudan [39,40], southwestern  
370 Ethiopia [13], and the northern Ethiopia [15]. Apparently, this sand fly species could be  
371 involved in the transmission of VL in this new VL focus. As a result, further studies to  
372 determine the infection rates and host preference patterns of this vector species are  
373 required.

374 Another epidemiologically important species of the genus *Phlebotomus* found during our  
375 surveys included *P. alexandri*, *P. papatasi*, *P. rodhaini*, and *P. saevus*. The vectorial status of  
376 *P. alexandri* is not clearly established in different parts of Ethiopia despite it is a proven  
377 vector of *L. infantum*, causative of zoonotic VL, in China [41]. *P. rodhaini* reported in this  
378 study is also suspected as a VL vector in eastern Sudan and is implicated in maintaining the  
379 zoonotic cycle between reservoir animals [42]. *L. tropica* was also isolated from two  
380 specimens of *P. saevus* in the Awash Valley, northeastern Ethiopia [43]. Similarly, *P.*

381 *papatasi* is the principal vector of *L. major* in most parts of the Old World [44], albeit its  
382 vectorial role in CL transmission in Ethiopia is yet unclear.

383  
384 Species of the genus *Sergentomyia* were almost predominant in the collections compared to  
385 the genus *Phlebotomus* with 74.24% of species identified. Such preponderance has already  
386 been observed in many surveys, notably in Ethiopia and elsewhere in Afrotropical regions  
387 [45,46].

388 Regarding the microhabitat preference, most of the *P. orientalis* were captured from  
389 termite mounds followed by forest dwellings. Such higher abundance of this species in  
390 outdoor habitats could be related to the greater availability of suitable resting and breeding  
391 habitats. In addition, some of the vegetation could provide shade and source of sugar for  
392 adult populations [47]. However, no single specimen of *P. orientalis* was caught indoor,  
393 which is in agreement with earlier study in southeastern part of the Somali region [38].

394

## 395 **Conclusions**

396 In conclusion, the sero-prevalence of VL among the asymptomatic pastoralist community is  
397 relatively higher as new VL focus. Adults in the age group 19-36 showed higher VL sero-  
398 reactivity compared to other age groups in the study. The main factors associated with  
399 increased risk of VL infection factors were living in houses with damp floor, outdoor sleeping  
400 behaviors, and sleeping near animal shelter. Poor knowledge coupled with unfavorable  
401 attitudes and practices towards the disease are also alarming issues against the ease to  
402 control the disease, suggesting the need to increase awareness of VL transmission and  
403 prevention in pastoral communities. *P. orientalis*, proven vector of VL, apparently  
404 contributes to the VL transmission in this new VL focus. Further wide-ranging studies on the  
405 epidemiology and magnitude of the disease and investigations of other contributing risk  
406 factors in the area are required. Concurrently, additional studies to understand the  
407 bionomics of *P. orientalis* should be carried out to effectively control the disease.

## 408 **Acknowledgements**

409 The authors would like to acknowledge Addis Ababa University for sponsoring the study. We  
410 also thank Ethiopian Public Health Institute for allowing us to use the lab facility to run DAT.

411 Our appreciation also goes to Denan District Health Office for or their valuable information  
412 and support.

### 413 **Author contributions**

414 Conceptualization: Ahmed Ismail, Solomon Yared, Araya Gebresilassie

415 Data curation: Ahmed Ismail, Araya Gebresilassie

416 Formal analysis: Ahmed Ismail, Solomon Yared, Sisay Dugassa, Abebe Animut, Berhanu Erko,  
417 Adugna Abera, Araya Gebresilassie

418 Methodology: Ahmed Ismail, Solomon Yared, Adugna Abera, Araya Gebresilassie

419 Writing – original draft: Ahmed Ismail, Solomon Yared, Araya Gebresilassie

420 Writing – review & editing: Ahmed Ismail, Solomon Yared, Sisay Dugassa, Abebe Animut,  
421 Berhanu Erko, Adugna Abera, Araya Gebresilassie

### 422 **References**

- 423 1. Drugs for Neglected Diseases Initiative. Leishmaniasis—Disease fact sheet [Internet].  
424 2018. Available from: [https://www.dndi.org/wp-](https://www.dndi.org/wp-content/uploads/2018/12/Factsheet2018_Leishmaniasis.pdf)  
425 [content/uploads/2018/12/Factsheet2018\\_Leishmaniasis.pdf](https://www.dndi.org/wp-content/uploads/2018/12/Factsheet2018_Leishmaniasis.pdf)
- 426 2. World Health Organization: WHO. Leishmaniasis fact sheet (2021). Available at:  
427 <https://www.who.int/news-room/fact-sheets/detail/leishmaniasis>. Accessed 15  
428 November 2022.
- 429 3. Wamai RG, Kahn J, McGloin J, Ziaggi G. Visceral leishmaniasis: a global overview. *J Glob*  
430 *Health Sci.* 2020 2 Suppl 1:e3.
- 431 4. World Health Organization: WHO. Leishmaniasis Ethiopia profile-2015. Vol. 2017.  
432 Geneva: World Health Organization. Accessed 12 November 2022.
- 433 5. Leta S, Dao THT, Mesele F, Alemayehu G. Visceral leishmaniasis in Ethiopia: An evolving  
434 disease. *PLoS Negl Trop Dis.* 2014; 8: e3131.
- 435 6. Gadisa E, Tsegaw T, Abera A, Elnaiem D, den Boer M, Aseffa A. et al. Eco-epidemiology of  
436 visceral leishmaniasis in Ethiopia. *Paras Vect.* 2015, 8:381.
- 437 7. Alvar J, Vélez ID, Bern C, Herrero M, Desjeux P, Cano J, et al. Leishmaniasis worldwide  
438 and global estimates of its incidence. *PLoS One.* 2012;7: e35671.

- 439 8. Marlet MV, Sang DK, Ritmeijer K, Muga RO, Onsongo J, Davidson RN. Emergence or re-  
440 emergence of visceral leishmaniasis in areas of Somalia, north eastern Kenya, and south  
441 eastern Ethiopia in 2000-2001. *Trans R Soc Trop Med Hyg.* 2003; 97: 515-518.
- 442 9. Medicines Sans Frontiers: Perception of kala-azar among Pokot communities in Amudat,  
443 Uganda. 2002, Switzerland: Final report by Epicenter and MSF, 348-349.
- 444 10. Alebie G, Worku A, Yohannes S, Urga B, Hailu A, Tadesse D. Epidemiology of visceral  
445 leishmaniasis in Shebelle Zone of Somali Region, eastern Ethiopia. *Parasit Vectors.* 2019;  
446 12:209.
- 447 11. Tsegaw T, Gadisa E, Seid A, Abera A, Teshome A, Mulugeta A, et al. Identification of  
448 environmental parameters and risk mapping of visceral leishmaniasis in Ethiopia by  
449 using geographical information systems and a statistical approach. *Geospatial Health.*  
450 2013;7 (2):299–308.
- 451 12. Aklilu E, Gebresilassie A, Yared S, Legesse B, Hailu A. Phlebotomine sandflies (Diptera:  
452 Psychodidae) of Ethiopia: review. *Heliyon.* 2022 (Submitted).
- 453 13. Hailu A, Balkew M, Berhe N, Meredith S, Gemetchu T. Is *Phelotomus* (Larrousius)  
454 *orientalis* a vector of visceral leishmaniasis in southwest Ethiopia? *Acta Trop.* 1995; 60:  
455 15-20.
- 456 14. Gebre-Michael T, Lane R. The roles of *Phlebotomus martini* and *P. celiae* (Diptera:  
457 Phlebotominae) as vectors of visceral leishmaniasis in the Aba-Roba focus, southern  
458 Ethiopia. *Med Vet Entomol* 1996; 10: 53-62
- 459 15. Kirstein OD, Skrip L, Abassi I, lungman T, Horwitz BZ, Gebresilassie A, et al. A fine scale  
460 eco-epidemiological study on endemic visceral leishmaniasis in north Ethiopian villages.  
461 *Acta Trop.* 2018; 183:64-77
- 462 16. Central Statistical Agency: CSA. The 2007 National Census report for Ethiopia. Addis  
463 Ababa: Central Statistical Agency; 2008.
- 464 17. Thrusfield M. *Veterinary epidemiology.* 2nd ed. Oxford: Blackwell Science; 2005.
- 465 18. Abonnenc E, Minter DM. Bilingual keys for the identification of the sandflies of the  
466 Ethiopian Region (in Fr. and Eng.). *Cah Off Rech Sci Tech Outre-Mer Entomol Med (Ser*  
467 *Entomol Med Parasitol)* 1965; 5: 1-63.
- 468 19. Lemma W, Tekie H, Yared S, Balkew M, Gebre-Michael T, Warburg A. et al. Sero-  
469 prevalence of *Leishmania donovani* infection in labour migrants and entomological risk

- 470 factors in extra-domestic habitats of Kafta-Humera lowlands--kala-azar endemic areas in  
471 the northwest Ethiopia. BMC Infectious Diseases. 2015; 15(1):99.
- 472 20. Tadese D, Hailu A, Bekele F, Belay S. An epidemiological study of visceral leishmaniasis in  
473 North East Ethiopia using serological and leishmanin skin tests. PLoS ONE.  
474 2019;14(12):e0225083.
- 475 21. Bejano S, Shumie G, Kumar A, Asemahagn E, Damte D, Sinkinesh Woldie S. et al.  
476 Prevalence of asymptomatic visceral leishmaniasis in human and dog, Benishangul  
477 Gumuz regional state, Western Ethiopia. Parasit Vectors. 2021;14:39.
- 478 22. Sordo L, Gadisa E, Custodio E, Cruz I, Simón F, Abraham Z, Moreno et al. Low prevalence  
479 of *Leishmania* infection in post-epidemic areas of Libo Kemkem, Ethiopia. Am J Trop  
480 Med Hyg. 2012;86(6):955-8.
- 481 23. Bantie K, Tessema F, Massa D, Tafere Y. Factors associated with visceral leishmaniasis  
482 infection in North Gondar zone, Amhara region, North West Ethiopia, case control study.  
483 Sci J Publ Health. 2014;2 (6): 560-568.
- 484 24. Nyungura JL, Nyambati VC, Muita M, Muchiri E. Risk factors for the transmission of kala-  
485 azar in Fangak, South Sudan. SSMJ. 2011;4(2):26–9.
- 486 25. Akter S, Alam MZ, Islam MT,. Mondal MMH. Seroepidemiological study of visceral  
487 leishmaniasis and cattle as a possible reservoir host at Trishal Upazila in Bangladesh. J.  
488 Bangladesh Agril. Univ. 2012; 10(1):79–86.
- 489 26. Perry DK, Dixon R, Garlapati A, Gendernalik D, Poche R. Visceral leishmaniasis prevalence  
490 and associated risk factors in the saran district of Bihar, India, from 2009 to July of 201.  
491 Am J Trop Med Hyg. 2013;88:778–84.
- 492 27. Bern C, Joshi AB, Jha SN, Das ML, Hightower A, Thakur GD, Bista MB. Factors associated  
493 with visceral leishmaniasis in Nepal: bed-net use is strongly protective. Am J Trop Med  
494 Hyg. 2000; 63:184–188.
- 495 28. Singh SP, Hasker E, Picado A, Gidwani K, Malaviya P, Singh RP, et al. Risk factors for  
496 visceral leishmaniasis in India: further evidence on the role of domestic animals. Trop  
497 Med Int Health. 2010; 15 (Suppl 2): 29–35.
- 498 29. Bashaye S, Nombela N, Argaw D, Mulugeta A, Herrero M, Nieto J, et al. Risk factors for  
499 visceral leishmaniasis in a new epidemic site in Amhara Region, Ethiopia. Am J Trop Med  
500 Hyg. 2009;81 (1):34-39.

- 501 30. Bsrat A, Berhe M, Gadissa E, Taddele H, Tekle Y, Hagos Y, et al. (2018). Serological  
502 investigation of visceral Leishmania infection in humans and its associated risk factors in  
503 Welkait District, Western Tigrai, Ethiopia. *Parasite Epidemiol Control*. 2018; 3(1):13–20.
- 504 31. Uranw S, Hasker E, Roy L, Meheus F, Das ML Bhattarai NR, et al. An outbreak  
505 investigation of visceral leishmaniasis among residents of Dharan town, eastern Nepal,  
506 evidence for urban transmission of *Leishmania donovani*. *BMC Infect Dis*. 2013;13:21.
- 507 32. Yared S, Deribe K, Gebreselassie A, Lemma W, Akililu E, Kirstein OD, et al. Risk factors of  
508 visceral leishmaniasis: a case control study in north-western Ethiopia. *Parasit Vectors*.  
509 2014;7:470.
- 510 33. Alemu A, Alemu A, Esmael N, Dessie Y, Hamdu K, Mathewos B, et al. Knowledge, attitude  
511 and practices related to visceral leishmaniasis among residents in Addis Zemen town,  
512 South Gondar, Northwest Ethiopia. *BMC Public Health*. 2013;13:382.
- 513 34. Devipriya JS, Gupta AK, Veeri RB, Garapati P, Kumar R, Dhingra S, et al. Knowledge,  
514 attitude and practices towards visceral leishmaniasis among HIV patients: A cross-  
515 sectional study from Bihar, India. *PLoS ONE*. 2021;16(8):e0256239.
- 516 35. Berhe M, Bsrat A, Taddele H, Gadissa E, Hagos Y, Tekle Y, et al. Knowledge attitude and  
517 practice towards visceral leishmaniasis among residents and health professionals in  
518 Welkait district, western Tigray. *J Trop Dis*. 2018;6(1):4-11
- 519 36. Gebresilassie A, Kirstein OD, Yared S, Aklilu E, Moncaz A, Tekie H, et al. Species  
520 composition of phlebotomine sand flies and bionomics of *Phlebotomus orientalis*  
521 (Diptera: Psychodidae) in an endemic focus of visceral leishmaniasis in Tahtay Adiyabo  
522 district, Northern Ethiopia. *Parasites & Vectors* 2015; 8: 248.
- 523 37. Yared S, Gebresilassie A, Akililu E, Deribe K, Balkew M, Warburg A, et al. Diversity and  
524 altitudinal distribution of phlebotomine sandflies (Diptera: Psychodidae) in visceral  
525 leishmaniasis endemic areas of northwest Ethiopia. *Acta Trop*. 2017; 176: 1-10.
- 526 38. Gebresilassie A, Yared S, Aklilu E. Sandfly fauna and ecological analysis of *Phlebotomus*  
527 *orientalis* and *Phlebotomus martini* in the lowland foci of visceral leishmaniasis in Somali  
528 Regional State, southeast Ethiopia. *Asian Pac J Trop Med*. 2020;13(1):31-37.
- 529 39. Elnaiem DA, Ward RD, Hassan HK, Miles MA, Frame LA. Infection rates of *Leishmania*  
530 *donovani* in *Phlebotomus orientalis* from a focus of visceral leishmaniasis in eastern  
531 Sudan. *Ann Trop Med Parasitol*. 1998;92: 229-232

- 532 40. Elnaiem DE. Ecology and control of the sand fly vectors of *Leishmania donovani* in East  
533 Africa, with special emphasis on *Phlebotomus orientalis*. J Vector Ecol. 2011; 36(Suppl  
534 1): S23-S31.
- 535 41. Li-Ren G, Yong-Xiang X, Bao-Shan L, Jiang D. The role of *Phlebotomus alexandri* Sinton,  
536 1928 in the transmission of kala-azar. Bull. World Health Organ. 1986;66: 107-112..
- 537 42. Elnaiem DE, Hassan HK, Osman OF, Maingon RD, Killick-Kendrick R, Ward RD. A possible  
538 role for *Phlebotomus* (*Anaphlebotomus*) *rodhaini* (Parrot, 1930) in transmission of  
539 *Leishmania donovani*. Parasit Vectors. 2011;4:238.
- 540 43. Gebre-Michael T, Balkew M, Ali A, Ludovisi A, Gramiccia M, The isolation of *Leishmania*  
541 *tropica* and *L. aethiopica* from *Phlebotomus* (*Paraphlebotomus*) species (Diptera:  
542 Psychodidae) in the Awash Valley, northeastern Ethiopia. Trans R Soc Trop Med Hyg.  
543 2004;98:64-70.
- 544 44. Killick-Kendrick R. Phlebotomine vectors of the leishmaniases - a review. Med Vet  
545 Entomol. 1990;4:1-24.
- 546 45. Akhoundi M, Kuhls K, Cannet A, Votýpka J, Marty P, Delaunay P et al. (2016). A Historical  
547 Overview of the Classification, Evolution, and Dispersion of *Leishmania* Parasites and  
548 Sandflies. PLoS Negl Trop Dis. 2016;10(3): e0004349.
- 549 46. Israël DK, Coulibaly CA, Sissoko IM, Traore´ B, Wilke ABB, Beier JC, et al. Distribution and  
550 diversity of sand fly species (Diptera: Psychodidae, Phlebotominae) in two Geoclimatic  
551 zones of Chad. Front Trop Dis. 2022;2:762295.
- 552 47. Elnaiem DA, Connors S, Thmoson M, Hassan MM, Hassan KH, Aboud MA, et al.  
553 Environmental determinants of the distribution of *Phlebotomus orientalis* in Sudan. Ann  
554 Trop Med Parasitol. 1998;92:877-887.
- 555
- 556
- 557
- 558
- 559
- 560
- 561



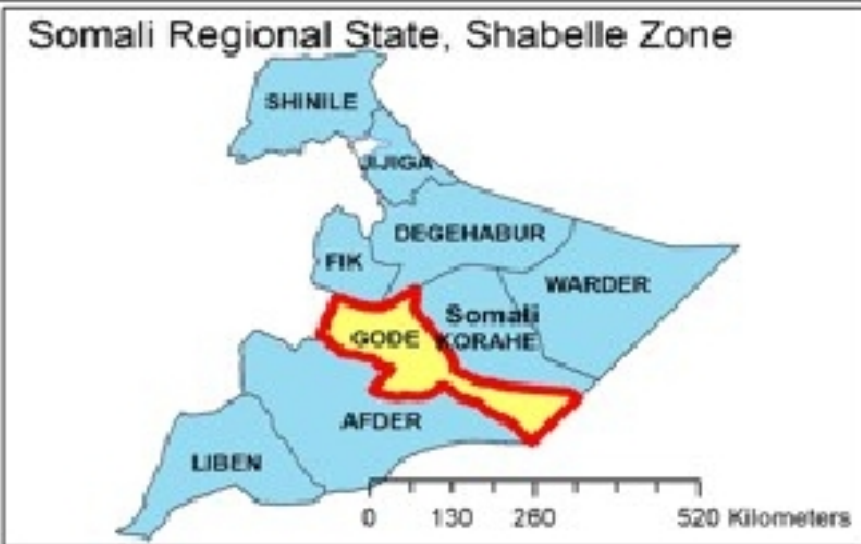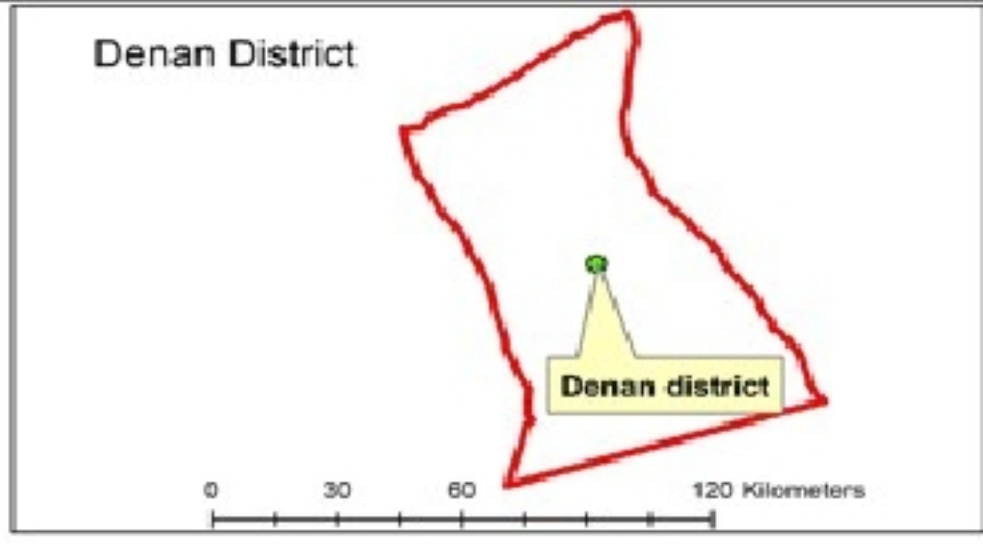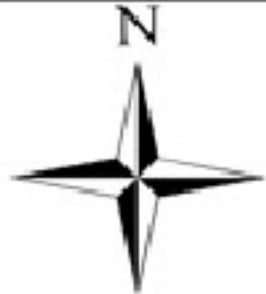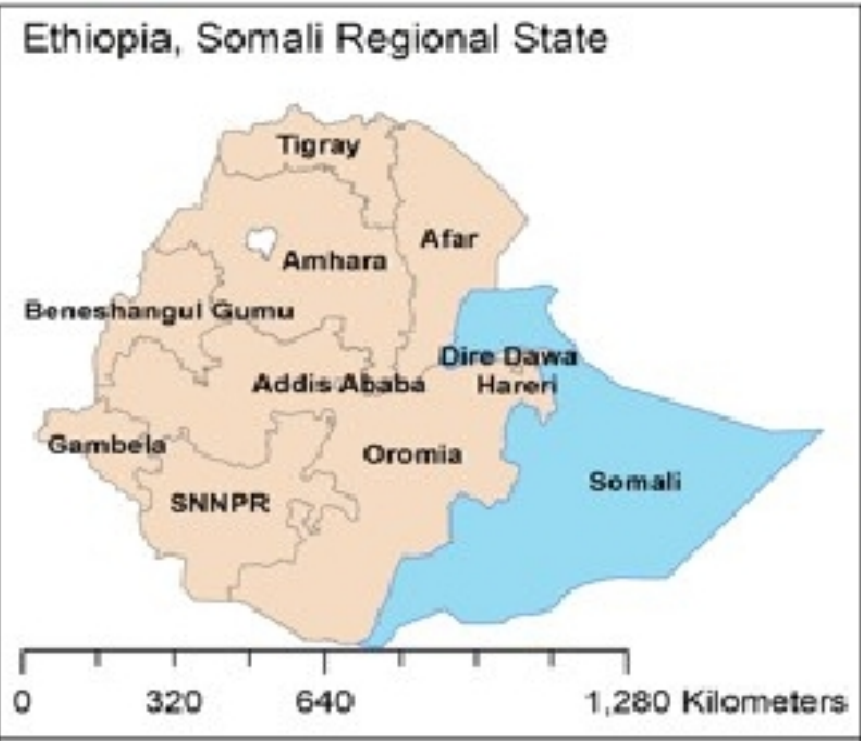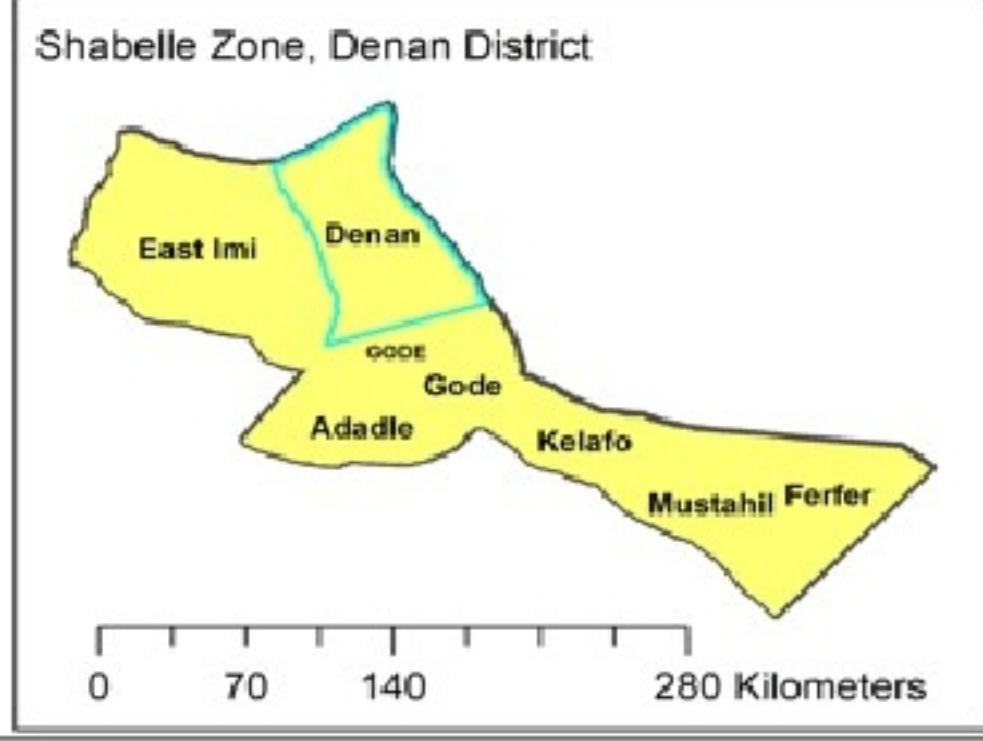

Fig 1
